# Supplementary material
Source: publisher figshare collection journal article supplement (https://tandf.figshare.com/ndownloader/files/14816681)
Supplement: Supplementary file 1 [file 14816681]

**SUPPLEMENTARY DATA**

**Supplementary Table S1**

**DNA oligonucleotides used in this study**

| **name** | **sequence** |
| --- | --- |
| **SUMO expression plasmids** | |
| R272AFw | CAGTGGGGATCTGCAGGAGGATTTGC |
| R272ARv | GCAAATCCTCCTGCAGATCCCCACTG |
| R278AFw | GGATTTGCAGGAGCAGCTCGTGGAAG |
| R278ARv | CTTCCACGAGCTGCTCCTGCAAATCC |
| R280AFw | GCAGGAAGAGCTGCTGGAAGAGGTGG |
| R280ARv | CCACCTCTTCCAGCAGCTCTTCCTGC |
| R282AFw | GGAAGAGCTCGTGGAGCAGGTGGTGGCCCCAG |
| R282ARv | CTGGGGCCACCACCTGCTCCACGAGCTCTTCC |
| R345AFw | GAAGGTATCCAGGGCAGGTGGTCATC |
| R345ARv | GATGACCACCTGCCCTGGATACCTTC |
| R278,280,282AFw | GGATTTGCAGGAGCAGCTGCTGGAGCAGGTGGTGGCCC |
| R278,280,282ARv | GGGCCACCACCTGCTCCAGCAGCTGCTCCTGCAAATCC |
| AUF1_R272KFor | CAACAGTGGGGATCTAAAGGAGGATTTGCAGG |
| AUF1_R272KRev | CCTGCAAATCCTCCTTTAGATCCCCACTGTTG |
| AUF1_R282KFor | GGAAGAGCTCGTGGAAAAGGTGGTGGCCCCAGTC |
| AUF1_R282KRev | GACTGGGGCCACCACCTTTTCCACGAGCTCTTCC |
| AUF1_R345KFor | GGGAAGGTATCCAGGAAAGGTGGTCATCAAAATAGC |
| AUF1_R345KRev | GCTATTTTGATGACCACCTTTCCTGGATACCTTCCC |
| p45_5xMutFor | GGATTTGCAGGAAAAGCTAAAGGAAAAGGTGGTGG |
| p45_5xMutRev | CCACCACCTTTTCCTTTAGCTTTTCCTGCAAATCC |
| AUF1 F100AFw | GAAGAATGGAAAATGGCTATAGGAGGCCTTAGC |
| AUF1 F100Arv | GCTAAGGCCTCCTATAGCCATTTTCCATTCTTC |
| AUF1 F142AFw | CAAGGGGTTTTGGCGCTGTGCTATTTAAAG |
| AUF1 F142Arv | CTTTAAATAGCACAGCGCCAAAACCCCTTG |
| AUF1 F185IFw | CGGTTAAAAAAATTATTGTTGGTGGCCTTTC |
| AUF1 F185Irv | GAAAGGCCACCAACAATAATTTTTTTAACCG |
| *Supplementary Table S1 continued* | |
| AUF1 F227IFw | GCGTGGGTTCTGCATTATTACCTTTAAGG |
| AUF1 F227Irv | CCTTAAAGGTAATAATGCAGAACCCACGC |

**Supplementary Table S2**

**RNA oligonucleotides used in this study**

| **name** | **sequence** |
| --- | --- |
| 3SLtrunc DENV | Cy5-5‘-AGAUCCUGCUGUCUCCUCGUUGAAUCAACAGGUUCU-3‘-BHQ |
| 5UAR DENV | 5‘-UUAGAGAGCAGAUCU-3‘ |
| 5CS WNV | Cy5-5’-UGUCAAUAUGCUAA-3’ |
| 3CS WNV | Cy3-5’-AGCAUAUUGACACC-3’ |
| AU/GU-rich RNA | FAM-EX-5’-UAUUUAGUGGUGUUAG-3’ |
| random RNA | FAM-EX-5’-CUAAGAUGCUCGCUGC-3’ |
